# Supplementary material for: Magnetically recyclable catalytic activity of spiky magneto-plasmonic nanoparticles
Source: Royal Society of Chemistry journal article supplement (doi:10.1039/c5ra08425c), 2015-01-01
Supplement: c5ra08425c1.pdf [file c5ra08425c1.pdf]

## Supporting Information

# Magnetically Recyclable Catalytic Activity of Spiky Magnetoplasmonic Nanoparticles

Fengming Zou<sup>a,†</sup>, Qianqian Ding<sup>b,†</sup>, Van Tan Tran<sup>c</sup>, Guozhong Wang<sup>b</sup>, Yunxia Zhang<sup>b</sup>,  
Shenghong Kang<sup>b</sup>, Jaebeom Lee<sup>c,\*</sup>, Hongjian Zhou<sup>b,\*</sup>

<sup>1</sup>High Magnetic Field Laboratory, Chinese Academy of Sciences, Hefei 230031, P. R. China

<sup>2</sup>Key Laboratory of Materials Physics, Centre for Environmental and Energy Nanomaterials, Anhui Key Laboratory of Nanomaterials and Nanotechnology, Institute of Solid State Physics, Chinese Academy of Sciences, Hefei 230031, P.R. China

<sup>3</sup>Department of Cogno-Mechatronics Engineering, Pusan National University, Busan 609-735, Republic of Korea

\*Corresponding author: [jaebeom@pusan.ac.kr](mailto:jaebeom@pusan.ac.kr) (J. Lee); [hjzhou@issp.ac.cn](mailto:hjzhou@issp.ac.cn) (H. Zhou)

<sup>†</sup>These authors contributed equally to this work

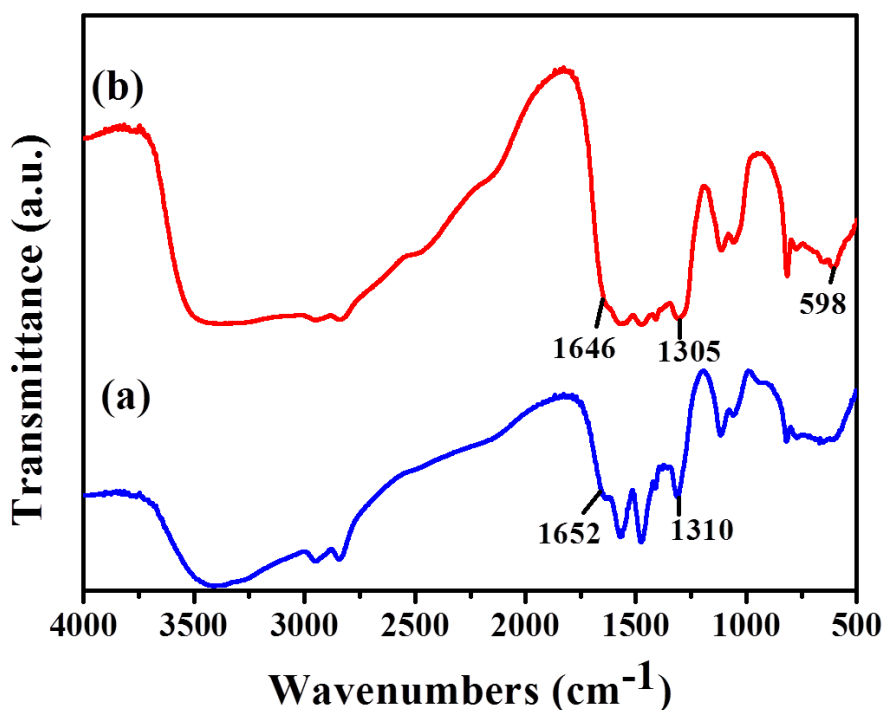

Figure S1. FT-IR spectra of pure PEI (a) and Fe<sub>3</sub>O<sub>4</sub>@PEI NPs (b)

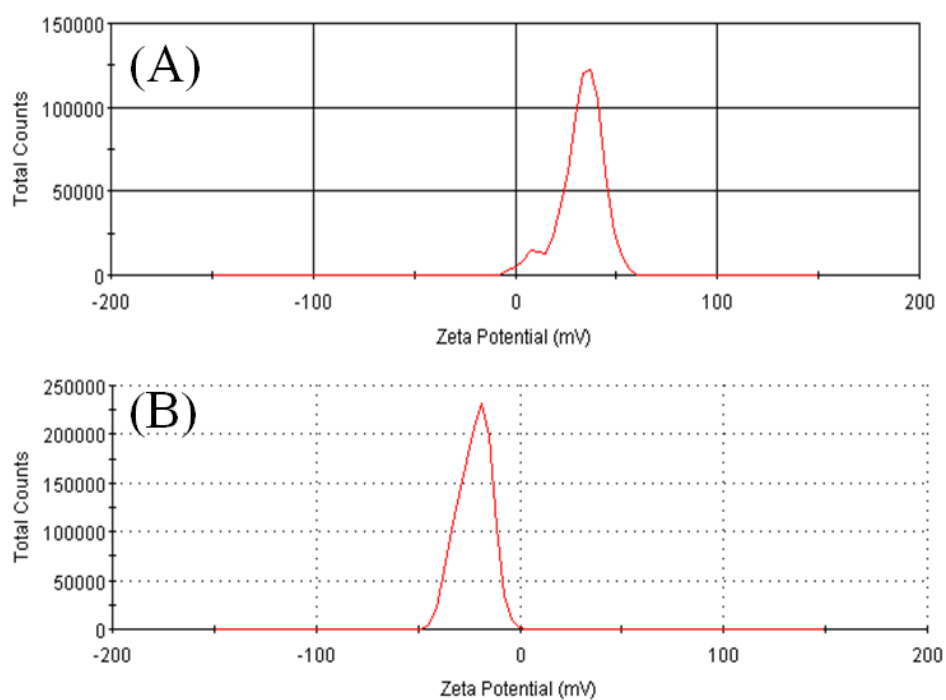

Figure S2. Zeta potential distribution of (A) Fe<sub>3</sub>O<sub>4</sub> NPs and (B) Au NPs

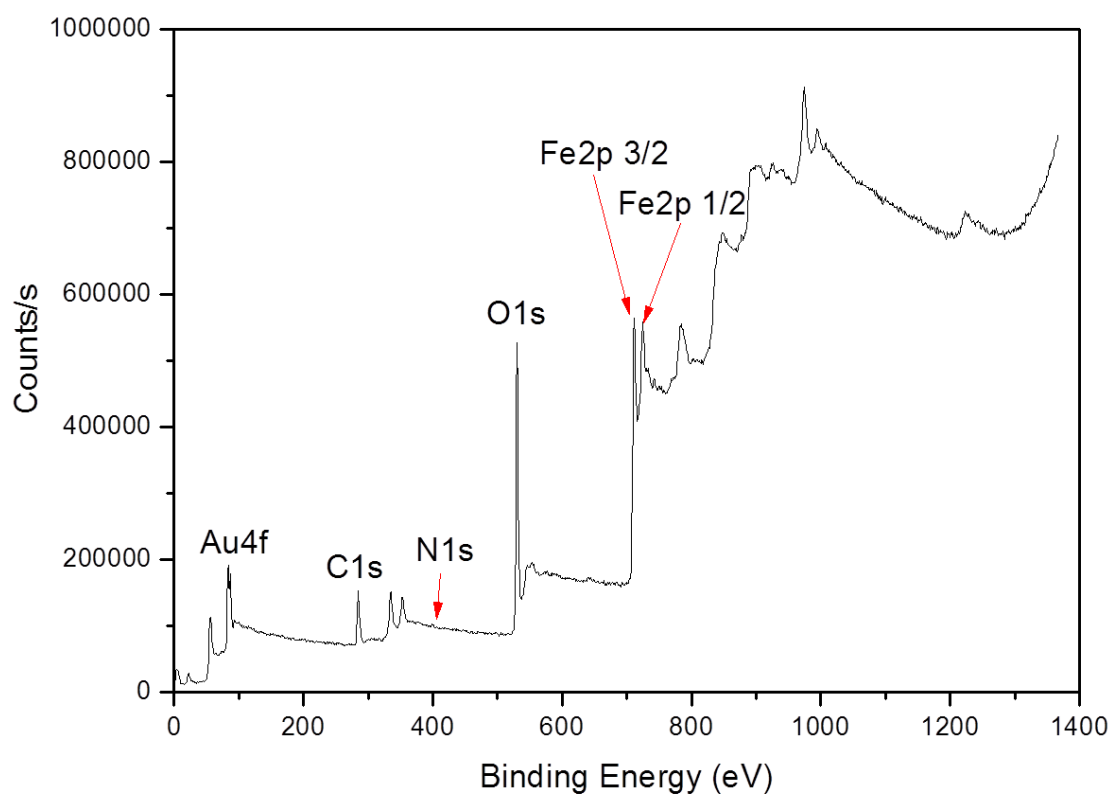

Figure S3. XPS spectra of spiky Fe<sub>3</sub>O<sub>4</sub>@Au NPs

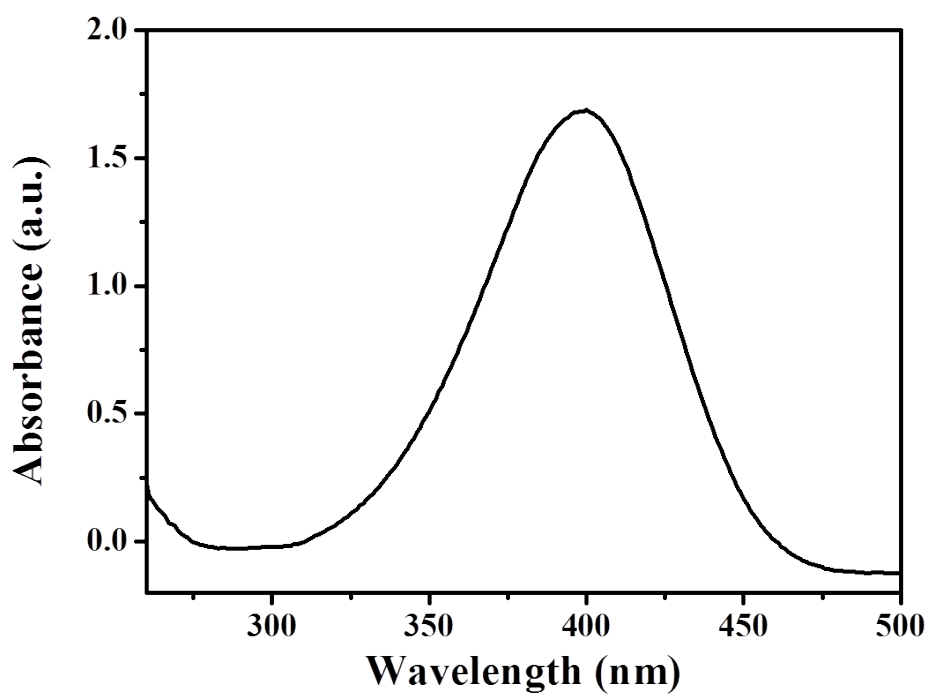

Figure S4. UV-Vis spectral changes in 4-nitrophenol catalyzed by  $\text{Fe}_3\text{O}_4$  NPs in presence of  $\text{NaBH}_4$

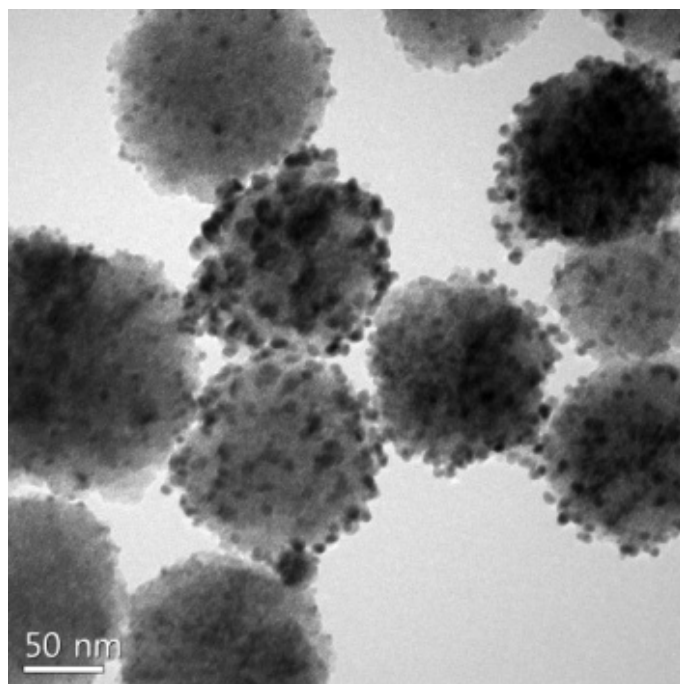

Figure S5. The TEM image of spiky  $\text{Fe}_3\text{O}_4@Au$  NPs after four successive cycles of catalytic reaction of 4-nitrophenol

Table S1. The loading amount of gold (wt% Au content) of core-satellite Fe<sub>3</sub>O<sub>4</sub>@Au NPs and spiky Fe<sub>3</sub>O<sub>4</sub>@Au NPs by Inductively Coupled Plasma (ICP)

| Sample Name                                           | Au content (wt %) | Fe content (wt %) |
|-------------------------------------------------------|-------------------|-------------------|
| Core-satellite Fe <sub>3</sub> O <sub>4</sub> @Au NPs | 2.58 ppm          | 21.57 ppm         |
| Spiky Fe <sub>3</sub> O <sub>4</sub> @Au NPs          | 6.98 ppm          | 20.94 ppm         |
